# Supplementary material
Source: HighWire-hosted journal article supplement (https://bmjopen.bmj.com/content/10/12/e043449)
Supplement: inline-supplementary-material-1 [file inline-supplementary-material-1.pdf]

## Glenoid failure after total shoulder arthroplasty with cemented all-polyethylene versus metal-backed implants: a systematic review protocol

### Databases:

- Medline
- EMBASE

### Date range:

- All dates included.

Renato Aroca Zan, Rafael Fuchs Lazarini, Fábio Teruo Matsunaga, Nicola Archetti Netto, João Carlos Belloti & Marcel Jun Sugawara Tamaoki.

## Full Search Strategy

Languages:• All languages included (where applicable, attempts at translation will be conducted).

Population:• All populations included (to be specified in inclusion/exclusion criteria during screening).

Study Type:• All study types included (to be specified in inclusion/exclusion criteria during screening).

### Medline (Ovid) Legend:

```
((((("arthroplasty, replacement, shoulder"[MeSH Terms] OR ("arthroplasty"[All Fields] AND "replacement"[All Fields] AND "shoulder"[All Fields]) OR "shoulder replacement arthroplasty"[All Fields] OR ("total"[All Fields] AND "shoulder"[All Fields] AND "arthroplasty"[All Fields]) OR "total shoulder arthroplasty"[All Fields]) AND glenoide[All Fields]) AND loosening[All Fields]) OR keeled[All Fields]) OR pegged[All Fields]) OR metal-backed[All Fields]) AND radiolucency[All Fields]AND
```

### EMBASE (Ovid) Legend:

```
#1('total shoulder arthroplasty':ti,ab,kw AND 'glenoid cavity':ti,ab,kw AND 'prosthesis loosening':ti,ab,kw OR 'glenoid baseplate' OR 'glenoid component of shoulder prosthesis' OR polyethylene) AND radiolucency glenoid loosening2020-04-272020-04-27105
```

### Sources

MEDLINE

Embase

```
Search ('total shoulder arthroplasty': ti,ab,kw AND 'glenoid cavity':ti,ab,kw AND 'prosthesis loosening':ti,ab,kw OR 'glenoid baseplate' OR 'glenoid component of shoulder prosthesis' OR polyethylene) AND radiolucency
```

```
In Fields total shoulder arthroplasty in Title total shoulder arthroplasty in Abstract total shoulder arthroplasty in Author keyword glenoid cavity in Title glenoid cavity in
```

Abstract glenoid cavity in Author keyword prosthesis loosening in Title prosthesis loosening in Abstract prosthesis loosening in Author keyword
